# Supplementary material for: Characterization of nucleolar SUMO isopeptidases unveils a general p53-independent checkpoint of impaired ribosome biogenesis
Source: PubMed Central journal article supplement (PMC10709353; doi:10.1038/s41467-023-43751-9), 2023-12-08
Supplement: 41467_2023_43751_MOESM3_ESM.pdf [file 41467_2023_43751_MOESM3_ESM.pdf]

## **Description of Additional Supplementary Files**

**File Name:** Supplementary Data 1

**Description:** SENP3 and SENP5 interactomes

**File Name:** Supplementary Data 2

**Description:** Candidate SENP3-controlled SUMO targets

**File Name:** Supplementary Data 3

**Description:** Proteome for SENP3 targets

**File Name:** Supplementary Data 4

**Description:** Candidate SENP5-controlled SUMO targets

**File Name:** Supplementary Data 5

**Description:** Proteome for SENP5 targets

**File Name:** Supplementary Data 6

**Description:** UTP14A interactome

**File Name:** Supplementary Data 7

**Description:** Proteome for UTP14A interactome

**File Name:** Supplementary Data 8

**Description:** Proteome of siSENP3 in U2OS

**File Name:** Supplementary Data 9

**Description:** : RNA-Seq of siSENP3 in U2OS

**File Name:** Supplementary Data 10

**Description:** Proteome of siSENP3 in Saos-2

**File Name:** Supplementary Data 11

**Description:** RNA-Seq of siSENP3 in Saos-2

**File Name:** Supplementary Data 12

**Description:** List of used plasmids

**File Name:** Supplementary Data 13

**Description:** List of used siRNAs

**File Name:** Supplementary Data 14

**Description:** List of used antibodies
